# Supplementary material
Source: PubMed Central journal article supplement (PMC8191861)

# Supplementary Materials

## **Molecular determinants of the factor VIII/von Willebrand factor complex revealed by BIVV001 cryo-electron microscopy**

**Short Title:** Cryo-EM Structure of BIVV001

James R. Fuller,<sup>1,2</sup> Kevin E. Knockenhauer,<sup>3</sup> Nina C. Leksa,<sup>3</sup> Robert T. Peters,<sup>3</sup> Joseph D. Batchelor<sup>1</sup>

<sup>1</sup>Integrated Drug Discovery, Sanofi, Waltham, MA, USA

<sup>2</sup>Department of Biochemistry and Molecular Biology, University of Chicago, Chicago, IL, USA

<sup>3</sup>Rare Blood Disorders, Sanofi, Waltham, MA, USA

## Contents

|                                                                              |   |
|------------------------------------------------------------------------------|---|
| <b>Supplemental Methods</b> .....                                            | 2 |
| <i>Cryo-electron microscopy sample preparation and data processing</i> ..... | 2 |
| <b>Visualization</b> .....                                                   | 3 |
| <b>Supplemental Figure Legends</b> .....                                     | 3 |
| <b>References</b> .....                                                      | 4 |

## Supplemental Methods

### *Cryo-electron microscopy sample preparation and data processing*

Information on the three data collection sessions are given in Supplemental Table 1. For plasma cleaning/glow discharge of the cryo-electron microscopy grids prior to sample application, the first dataset used an UltrAufoil 1.2/1.3 300 mesh grid (Quantifoil), which was plasma cleaned using a PELCO easiGlow operating at 25 mA for 75 seconds; the other two datasets used CFlat 1.2/1.3 400 gold mesh grids (Protochips) that were cleaned at the same amperage for 45 seconds.

In RELION, micrographs and their resulting particles were divided into groups based on the microscope image-shift settings used during their collection, because exposures on the two non-tilted grids were collected using beam-/image-shifts to move to data collection locations where possible. Downstream during contrast transfer function (CTF) refinement, parameters (beam-tilt, and trefoil/fourth order aberrations) were fit separately within these groups. In both CisTEM and RELION, particles were extracted within a box size of 384 pixels (407.04 Å). All three-dimensional (3D) masks used in RELION were created using the mask creations functions available within RELION and were based on low-pass filtering the map from most recent prior 3D refinement; in CisTEM, the user-free auto-masking method was enabled and used the BIVV001 molecular weight as input. Masks that excluded certain domains (VWF-D3 for much of the first part of the workflow, and the factor VIII A domains for partial signal subtraction) were created by manual editing of low-pass filtered maps using the tools available in UCSF Chimera. Between each of the significant steps described in the main text (3D classifications, per-particle motion correction, partial signal subtraction, and the final 3D refinement), one cycle of 3D refinement, CTF refinement (per-particle defocus, beam-tilt and trefoil), was performed in order to maximize the quality of the particle information available to the following step. Preceding the final 3D refinement that produced the map used for model building, CTF refinement also included fitting of fourth order aberrations. The final map sharpening B-factor was fitted by RELION to be  $-69.32 \text{ \AA}^2$ .

For the Fourier shell correlations (FSC) given in Supplemental Figure 2 and resolution estimates given in Supplemental Table 4, the map-model FSC was calculated using the method implemented in Phenix, assuming a conservative map resolution of 3.89 Å (the third quartile of per-voxel resolutions, as estimated by RELION). The global half-maps FSC was calculated using the phase-randomization corrected methods implemented in RELION. Directional half-maps FSCs were calculated using 3DFSC version 3.0 using default settings. All half-maps FSCs were calculated within the same mask used for the final 3D refinement.

## Visualization

Figures were prepared using UCSF Chimera<sup>1</sup>, UCSF ChimeraX<sup>2</sup>, and PyMol<sup>3</sup>.

## Supplemental Figure Legends

**Supplementary Figure 1. Cryo-EM data processing workflow.** Following 2D classification and initial model refinement in CisTEM, CTF refinement was prioritized prior to 3D classification in Relion. This first 3D classification and subsequent per-particle motion correction (“particle polishing”) greatly improved overall map quality for FVIII and VWF D’. Further 3D classification paired with partial signal subtraction was then used to find a particle subset that improved the FVIII C2 and VWF D3 density and produce the final map used for model building.

**Supplementary Figure 2. Global and directional fourier shell correlation resolution estimates for the cryo-EM map.** (A) The global half-map fourier shell correlation (FSC) (bold black trace) indicates an overall resolution of 2.9 Å at the gold-standard 0.143 threshold. Also given are the median (blue) and mean (green) directional FSC curves generated by the 3DFSC software. The shaded green area represents the spread of  $\pm 1$  standard deviation of directional FSCs around the mean. Values given in the figure legend denote where each trace crosses the 0.143 threshold, marked by the horizontal dashed grey line. (B) A histogram of the resolution estimates (at FSC = 0.143) for each directional FSC sampled. (C) The map-model FSC calculated by Phenix (red), with the global half-map FSC (black) repeated for reference. The map-model FSC crosses the FSC = 0.5 threshold at 3.0 Å.

**Supplementary Figure 3. Angular particle distribution within the final cryo-EM map.** Particle orientations from the final 3D refinement step, represented as a 3D histogram along the surface of a sphere. The corresponding orientation of the map is shown for reference. Two views are given, related by a 90° rotation around the vertical axis.

**Supplementary Figure 4. Preferential position of BIVV001 Fc.** (A) 2D class average of a BIVV001 side view where the Fc domain is not visible, due to flexibility. (B) 2D class average in the same orientation as A where the Fc domain is visible on the back side of FVIII, indicated by the red arrow.

**Supplementary Figure 5. Cryo-EM potential map in low resolution regions corresponding to the FVIII C2 and VWF D3 domains.** Insets show representative regions of the map and model from the FVIII C2 (left), VWF D3 (below), and FVIII A3 (right) domains. Only docking and automated refinement were used for modeling the FVIII C2 and VWF D3 domains. The FVIII A3 region, for comparison, permitted manual model building and refinement in addition to

automated methods. In the insets, the map is shown as grey mesh and the BIV001 model as sticks with carbons colored by domain as indicated. The source of the zoomed insets is marked on a global view of the map by black boxes and arrows. Two views of VWF D3 are given to highlight the map-model agreement around  $\beta$ -sheet secondary structure. The map shown was sharpened and filtered to local resolution.

**Supplementary Figure 6. Cryo-EM potential map in the region around sulfated Y1680.** The model is shown as sticks colored by element, with carbons colored according to domain as indicated. The map is shown as grey mesh. The map shown was sharpened and filtered to local resolution.

**Supplementary Figure 7. FVIII a3 peptide forms a  $\beta$ -strand to cap the Til'  $\beta$ -sheet in VWF D'.** A close-up view of the three-stranded anti-parallel beta sheet formed between the Til' region of VWF (red) and the FVIII a3 peptide (yellow) is shown.

**Supplementary Movie 1. VWF-D3 rotates relative to VWF-D'.** The movie begins with the VWF-D'D3 crystal structure super-imposed onto the BIVV001 structure via the D' domain. The subsequent rotation shows the movement that VWF-D3 makes relative to VWF-D' as a result of binding to FVIII. The movie ends with VWF-D3 positioned below the FVIII C domains as described for the cryo-EM structure of BIVV001.

## References

1. Pettersen EF, Goddard TD, Huang CC, et al. UCSF Chimera--a visualization system for exploratory research and analysis. *J Comput Chem.* 2004;25(13):1605-1612.
2. Goddard TD, Huang CC, Meng EC, et al. UCSF ChimeraX: Meeting modern challenges in visualization and analysis. *Protein Science.* 2018;27(1):14-25.
3. Schrodinger, LLC. The PyMOL Molecular Graphics System, Version 1.8; 2015.

# Supplemental Table 1

## Details of cryo-EM data collection

| Grid type                   | Micrograph/<br>exposure count* | Pixel size<br>(Å/pixel) | Movie<br>frames | Movie frame<br>dose (e <sup>-</sup> /Å <sup>2</sup> ) | Total exposure<br>dose (e <sup>-</sup> /Å <sup>2</sup> ) | Target defocus<br>range (-μm) | Stage<br>tilt (°) |
|-----------------------------|--------------------------------|-------------------------|-----------------|-------------------------------------------------------|----------------------------------------------------------|-------------------------------|-------------------|
| UltrAufoil 1.2/1.3 300 mesh | 756                            | 1.06                    | 30              | 1.3101                                                | 39.3017                                                  | 1.2 – 2.6                     | 0                 |
| CFlat 1.2/1.3 400 gold mesh | 2551                           | 1.06                    | 30              | 1.3777                                                | 41.3297                                                  | 1.2 – 2.3                     | 0                 |
| CFlat 1.2/1.3 400 gold mesh | 649                            | 1.06                    | 30              | 1.349                                                 | 40.4697                                                  | 1.2 – 2.1                     | 30                |

\*Count represents useable micrographs

# Supplemental Table 2

## Cryo-EM Data and Model Refinement Statistics

|                                       |                                     |
|---------------------------------------|-------------------------------------|
| <b>Data collection and processing</b> |                                     |
| Instrument                            | Titan Krios G2                      |
| Voltage (kV)                          | 300 kV                              |
| Nominal magnification                 | 81,000x                             |
| Camera                                | Gatan K3                            |
| Pixel size (Å)                        | 1.06                                |
| Exposure dose                         | See Supplemental Table 1            |
| Defocus range (µm)                    |                                     |
| Micrographs, CTFFind                  | 0.44 – 4.73                         |
| Per-particle, refined                 | 0.40 – 4.99                         |
| Final particle images (no.)           | 116,200                             |
| <b>Map and model validation</b>       |                                     |
| Resolution (Å, masked)                |                                     |
| Half maps (FSC = 0.143)               | 2.91                                |
| Full map – Model (FSC = 0.5)          | 3.02                                |
| Masked model-map cross correlation    | 0.74                                |
| Model composition                     |                                     |
| Protein residues                      | 1678                                |
| Ligands                               | NAG: 5, BMA: 1, Zn: 1, Cu: 1, Ca: 2 |
| Model ADP/B factors (Å <sup>2</sup> ) |                                     |
| Protein mean (range)                  | 32.19 (0.02 – 149.50)               |
| Ligands mean (range)                  | 24.41 (3.20 – 75.21)                |
| Geometry R.M.S. deviations            |                                     |
| Bond lengths (Å) (no. outliers > 4σ)  | 0.003 (0)                           |
| Bond angles (°) (no. outliers > 4σ)   | 0.554 (0)                           |
| Ramachandran angles                   |                                     |
| Favored (%)                           | 96.91                               |
| Allowed (%)                           | 3.09                                |
| Outliers (%)                          | 0.00                                |
| Peptide plane outliers (%)            |                                     |
| Cis (proline / general)               | 2.4 / 0.0                           |
| Twisted (proline / general)           | 0.0 / 0.0                           |
| Rotamer outliers (%)                  | 0.13                                |
| Cβ outliers (%)                       | 0.00                                |
| Clashscore                            | 7.86                                |
| MolProbity score <sup>1</sup>         | 1.61                                |
| EMRinger score <sup>2</sup>           | 3.18                                |

1. Williams CJ, Headd JJ, Moriarty NW, et al. MolProbity: More and better reference data for improved all-atom structure validation. *Protein Sci.* 2018;27(1):293-315.

2. Barad BA, Echols N, Wang RY, et al. EMRinger: side chain-directed model and map validation for 3D cryo-electron microscopy. *Nat Methods.* 2015;12(10):943-946.

# Supplemental Table 3

## Hemophilia A missense mutations identified in FVIII-VWF D'D3 interface

| Interface                               | Interface residue | Mutation         | Disease severity           | Reported cases |
|-----------------------------------------|-------------------|------------------|----------------------------|----------------|
| FVIII a3-VWF D' (TiI')                  | Phe1677           | Val              | Moderate                   | 2              |
|                                         | Phe1677           | Ser              | Mild                       |                |
|                                         | Ile1679           | Thr              | Mild or moderate           | 8              |
|                                         | Tys1680           | Cys              | Mild or moderate           | 82             |
|                                         | Tys1680           | Phe              | Mild or moderate           |                |
| Tys1680                                 | Ser               | Mild or moderate |                            |                |
| FVIII A3-VWF D' (TiI')                  | Arg1696           | Gly              | Mild                       | 12             |
|                                         | Arg1696           | Gln              | Mild                       |                |
|                                         | Arg1696           | Pro              | Moderate                   |                |
|                                         | Tyr1698           | Cys              | Mild or severe             | 3              |
|                                         | Phe1699           | Leu              | Mild                       | 1              |
|                                         | Phe1738           | Leu              | Moderate                   | 1              |
|                                         | Asp1740           | Asn              | Mild or moderate or severe | 7              |
|                                         | Asp1740           | His              | Mild                       |                |
| Gln1745                                 | Arg               | Severe           | 1                          |                |
| His1867                                 | Asn               | Mild             | 1                          |                |
| FVIII C1-VWF D3 (VWD3)                  | Arg2090           | Cys              | Mild                       | 1              |
| FVIII C1-VWF D' (TiI')                  | Ser2099           | Pro              | Mild                       | 2              |
|                                         | Ser2099           | Phe              | Severe                     |                |
|                                         | Gln2100           | Glu              | Severe                     | 3              |
|                                         | Gln2100           | Arg              | Moderate or severe         |                |
|                                         | Ile2102           | Asn              | Mild                       | 1              |
| FVIII C1-FVIII a3 (Y1680)-VWF D' (TiI') | Arg2116           | Gly              | Mild or moderate           | 7              |
|                                         | Arg2116           | Pro              | Severe                     |                |
| FVIII C1-FVIII a3 (Y1680)-VWF D' (TiI') | Ser2119           | Phe              | Mild                       | 4              |
|                                         | Ser2119           | Tyr              | Mild or moderate           |                |
| FVIII C1-VWF D' (TiI')                  | Gly2121           | Glu              | Severe                     | 1              |
|                                         | Thr2122           | Asn              | Severe                     | 1              |
|                                         | Phe2127           | Ser              | Mild                       | 34             |
|                                         | Gly2128           | Ser              | Mild                       | 4              |
|                                         | Gly2128           | Asp              | Moderate or severe         |                |
|                                         | Asn2129           | Asp              | Moderate or severe         | 28             |
| Asn2129                                 | Ser               | Mild or moderate |                            |                |
| FVIII C1-VWF D' (E')                    | Val2130           | Gly              | Moderate                   | 1              |
|                                         | Asp2131           | Val              | Severe                     | 1              |
|                                         | Ser2133           | Pro              | Mild                       | 2              |
| FVIII C1-VWF D' (TiI')                  | Lys2136           | Glu              | Mild                       | 3              |
|                                         | Arg2150           | Cys              | Mild                       | 204            |
|                                         | Arg2150           | His              | Mild or moderate or severe |                |
|                                         | Arg2150           | Leu              | Mild                       |                |
|                                         | His2152           | Tyr              | Mild                       | 5              |
|                                         | His2152           | Arg              | Moderate                   |                |
|                                         | Pro2153           | Arg              | Severe                     | 6              |
|                                         | Pro2153           | Gln              | Mild or moderate           |                |
|                                         | Pro2153           | Leu              | Severe                     |                |
|                                         | Thr2154           | Ala              | Mild or severe             | 8              |
|                                         | Thr2154           | Asn              | Mild                       |                |
|                                         | Thr2154           | Ile              | Mild                       |                |
|                                         | His2155           | Asp              | Mild or moderate           | 4              |
| His2155                                 | Tyr               | Mild             |                            |                |
| His2155                                 | Arg               | Severe           |                            |                |
| His2155                                 | Pro               | Severe           |                            |                |
| Ser2157                                 | Arg               | Mild             | 1                          |                |
| FVIII C2-VWF D3 (C8-3)                  | Met2199           | Val              | Severe                     | 1              |
|                                         | Ala2201           | Pro              | Mild or moderate           | 27             |
|                                         | Thr2253           | Pro              | Mild                       | 2              |

# Supplemental Table 4

## VWD type 2N mutations in VWF-D'D3

| Residue | Mutation | Interface with FVIII? | Location in VWF | FVIII contacting domain |
|---------|----------|-----------------------|-----------------|-------------------------|
| Glu787  | Lys      | Y                     | D' (Til')       | C1                      |
| Thr791  | Met      | Y                     | D' (Til')       | C1                      |
| Met800  | Val      | Y                     | D' (Til')       | C1                      |
| Pro812  | Leu      | N                     | D' (Til')       | N/A                     |
| Arg816  | Trp      | Y                     | D' (Til')       | a3                      |
| Arg816  | Gln      | Y                     | D' (Til')       | a3                      |
| His817  | Gln      | Y                     | D' (Til')       | C1                      |
| Arg854  | Gln      | N                     | D' (E')         | N/A                     |
| Asp879* | Asn      | N                     | D3 (VWD3)       | N/A                     |
| Gln1053 | His      | Y                     | D3 (C8-3)       | C2                      |
| Glu1078 | Lys      | Y                     | D3 (C8-3)       | C2                      |

Source: Dong et al. 2019 Blood \*Also classified as type 2A



# Supplemental Figure 1

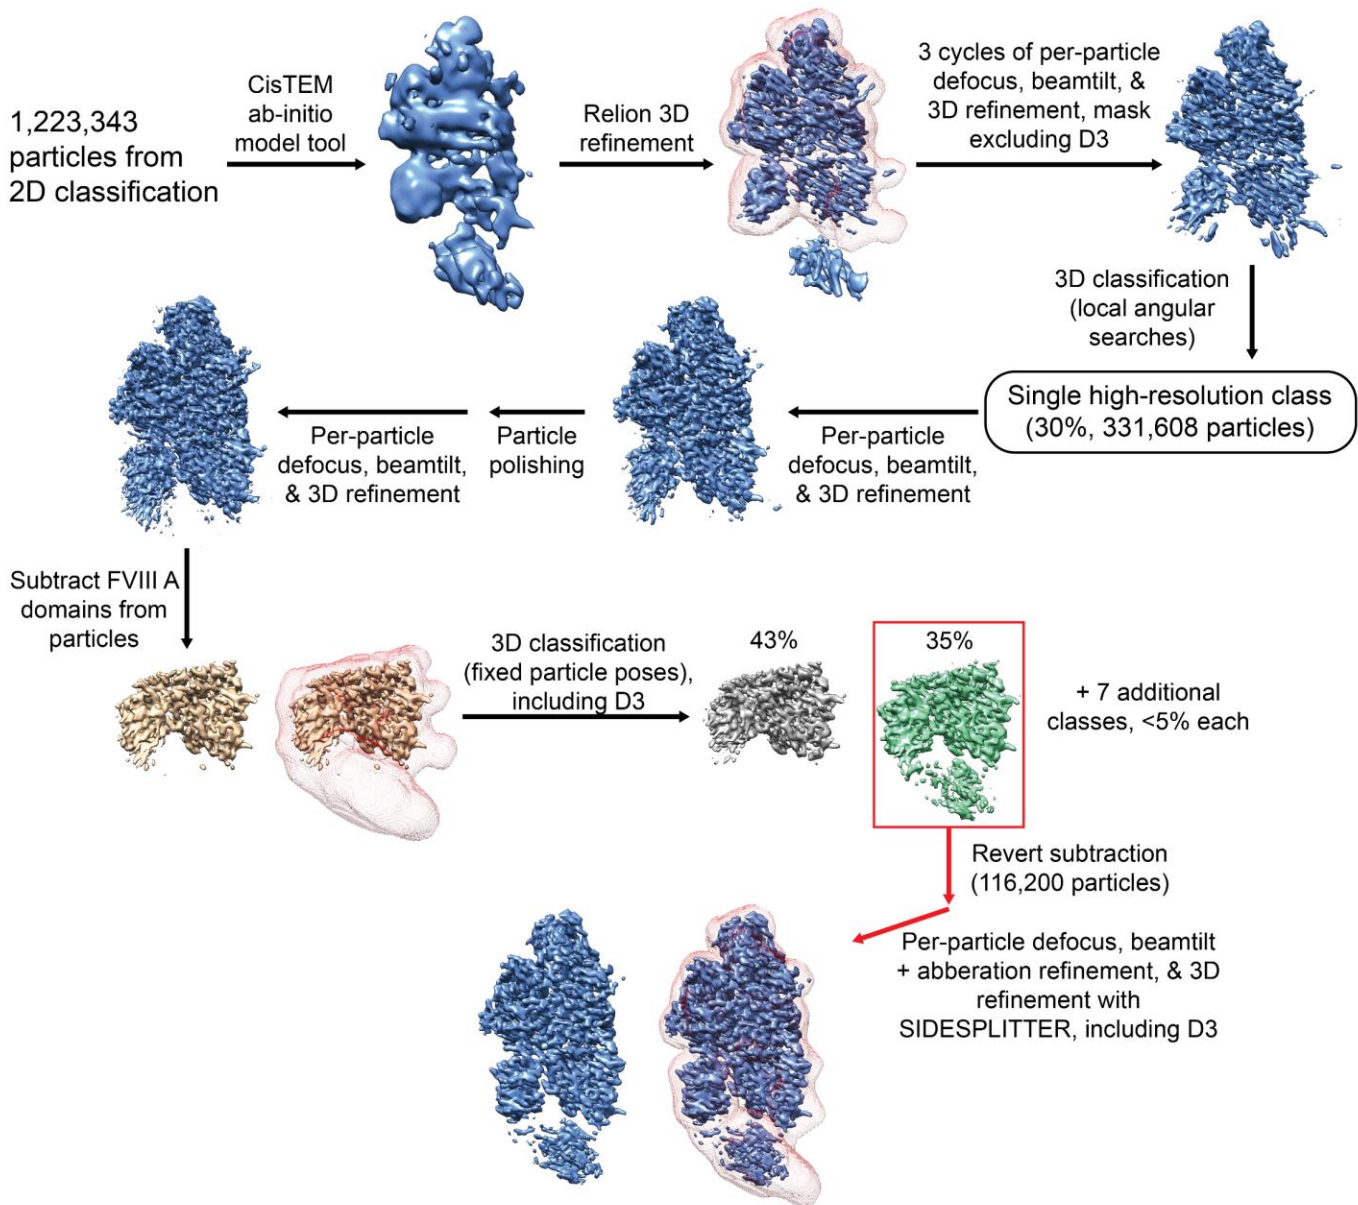

# Supplemental Figure 2

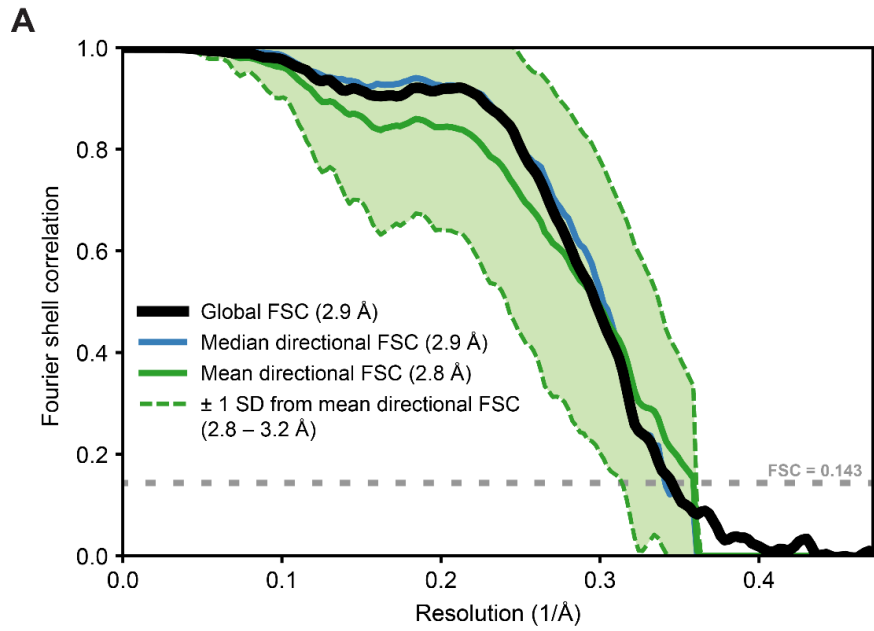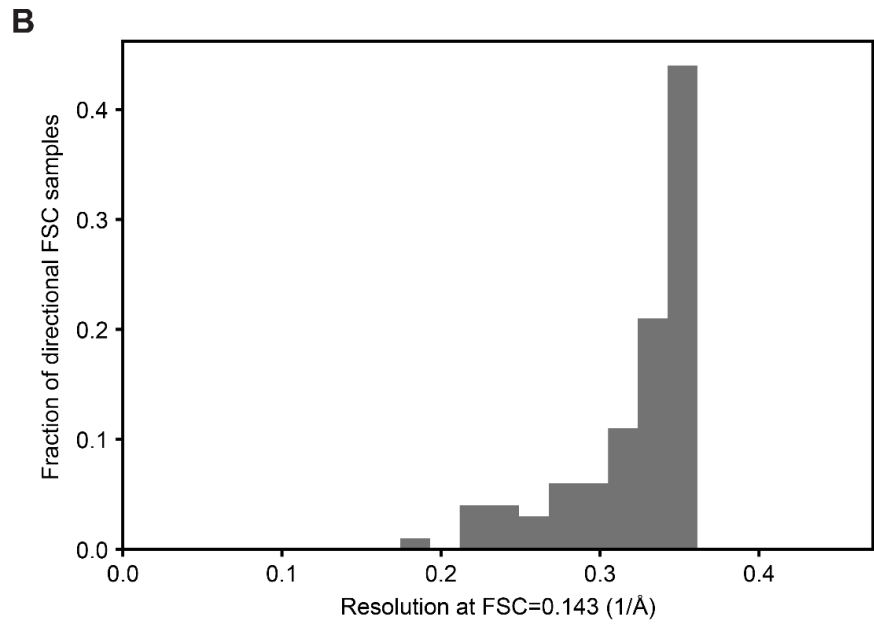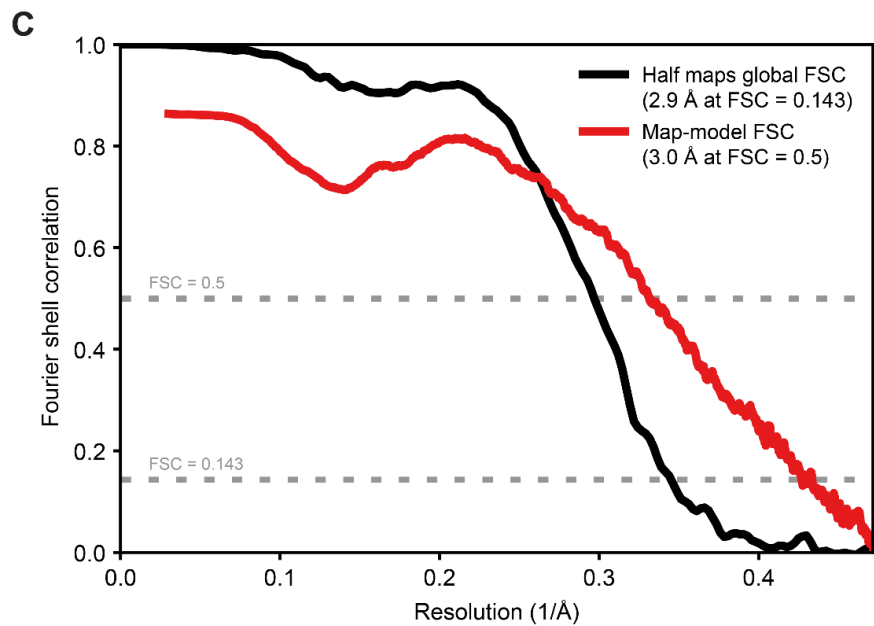

# Supplemental Figure 3

Front view

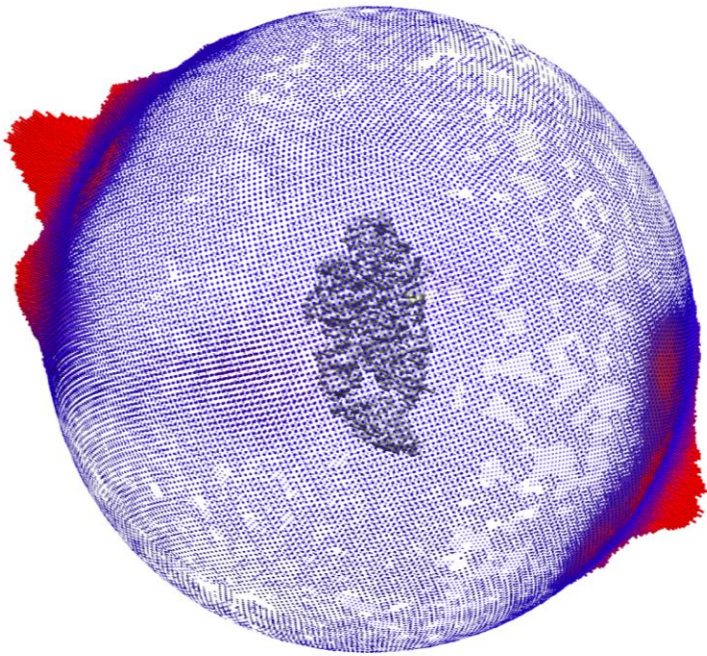

Side view

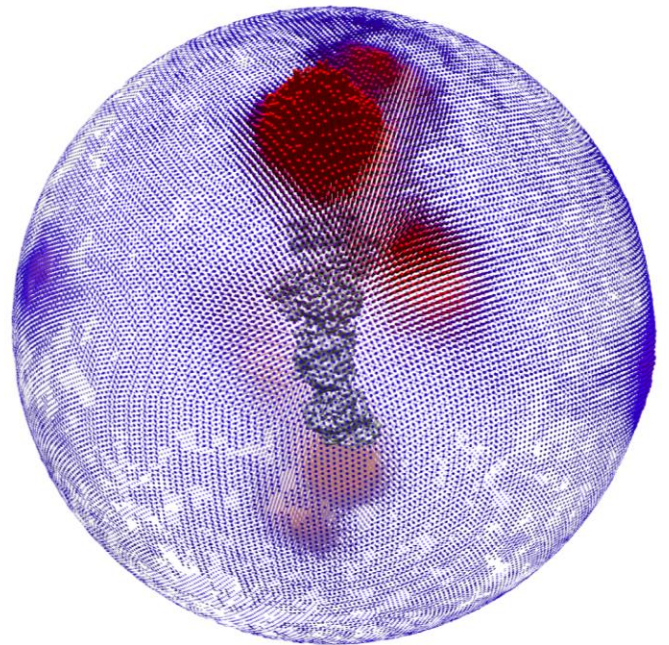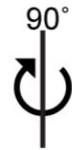

# Supplemental Figure 4

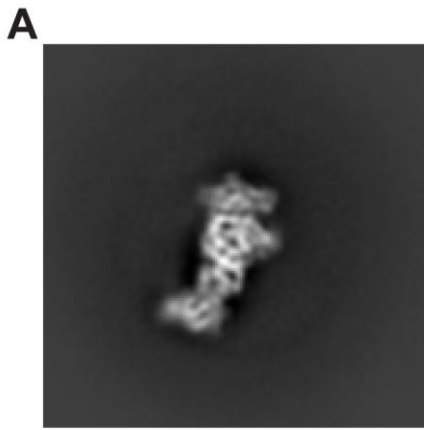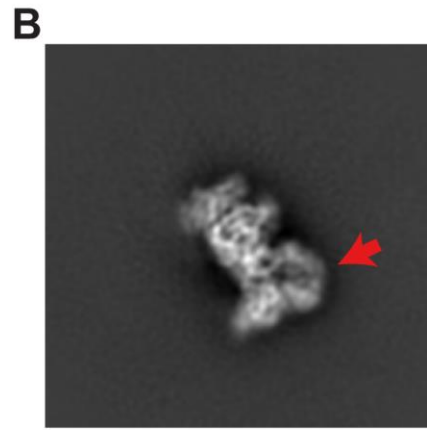

# Supplemental Figure 5

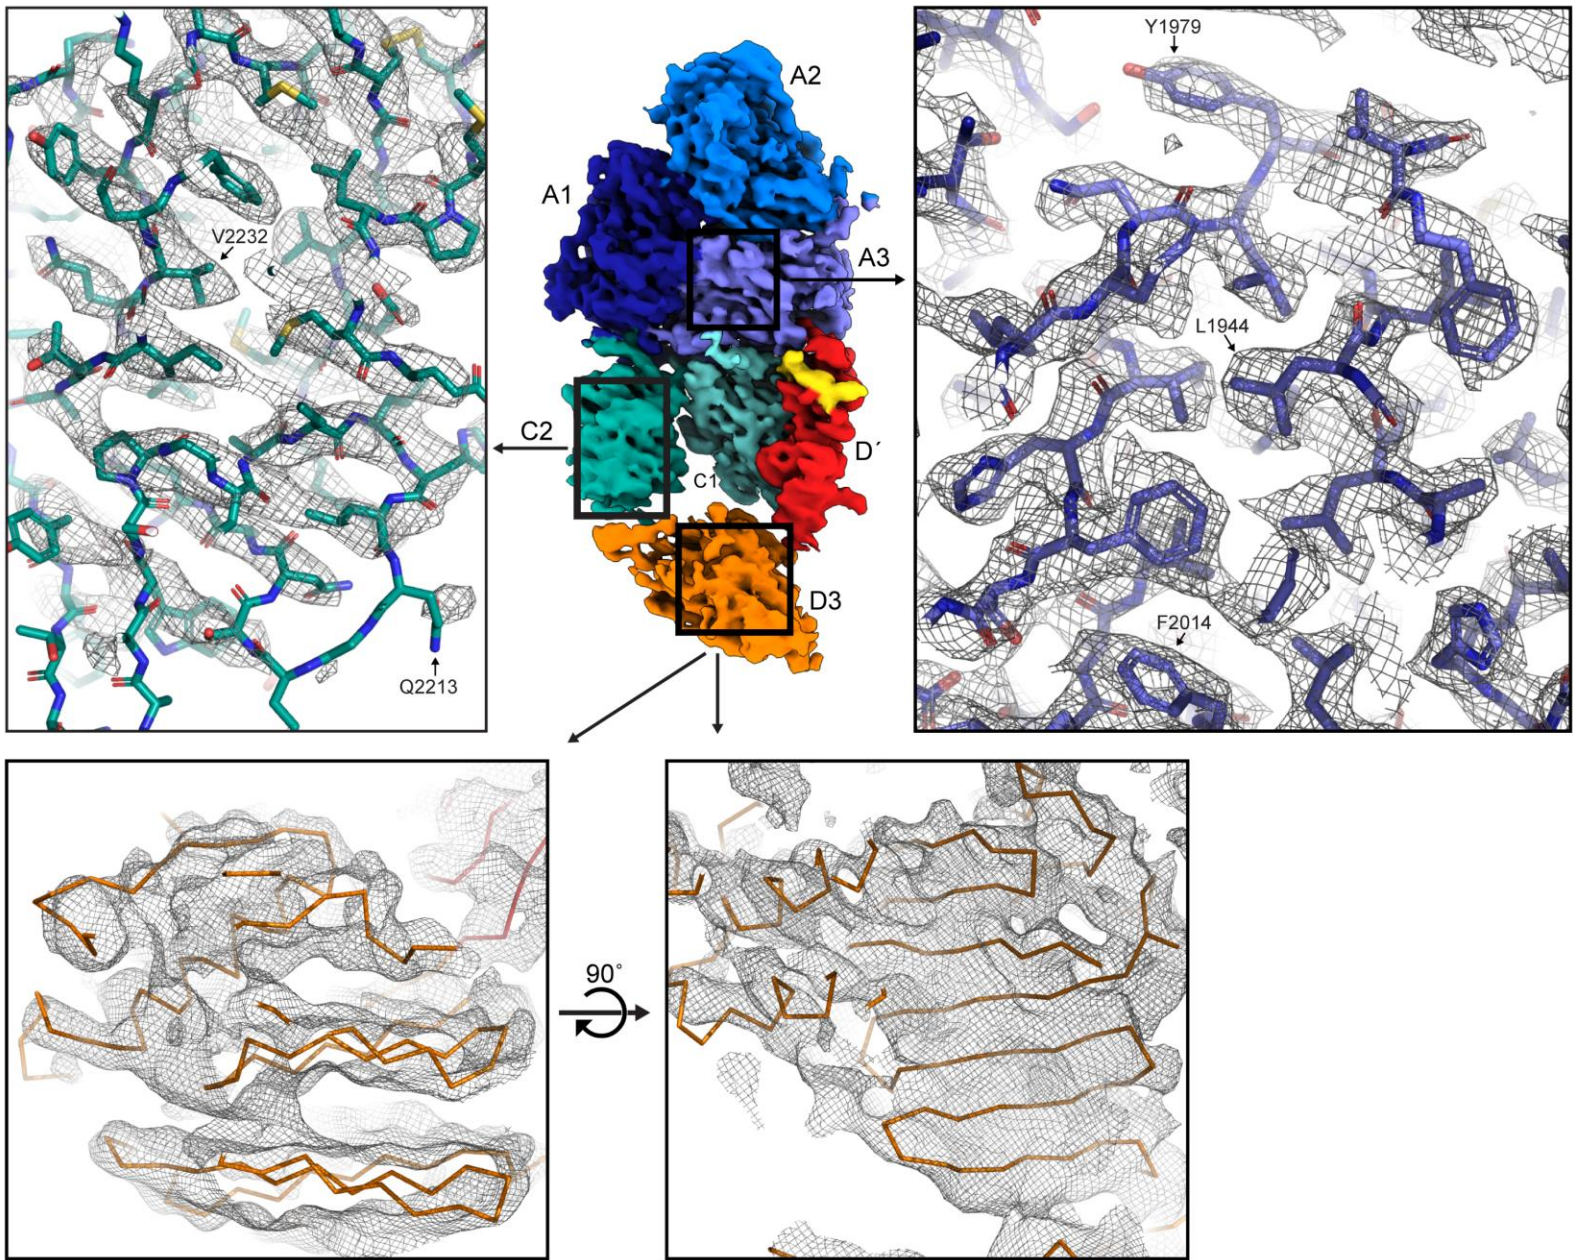

# Supplemental Figure 6

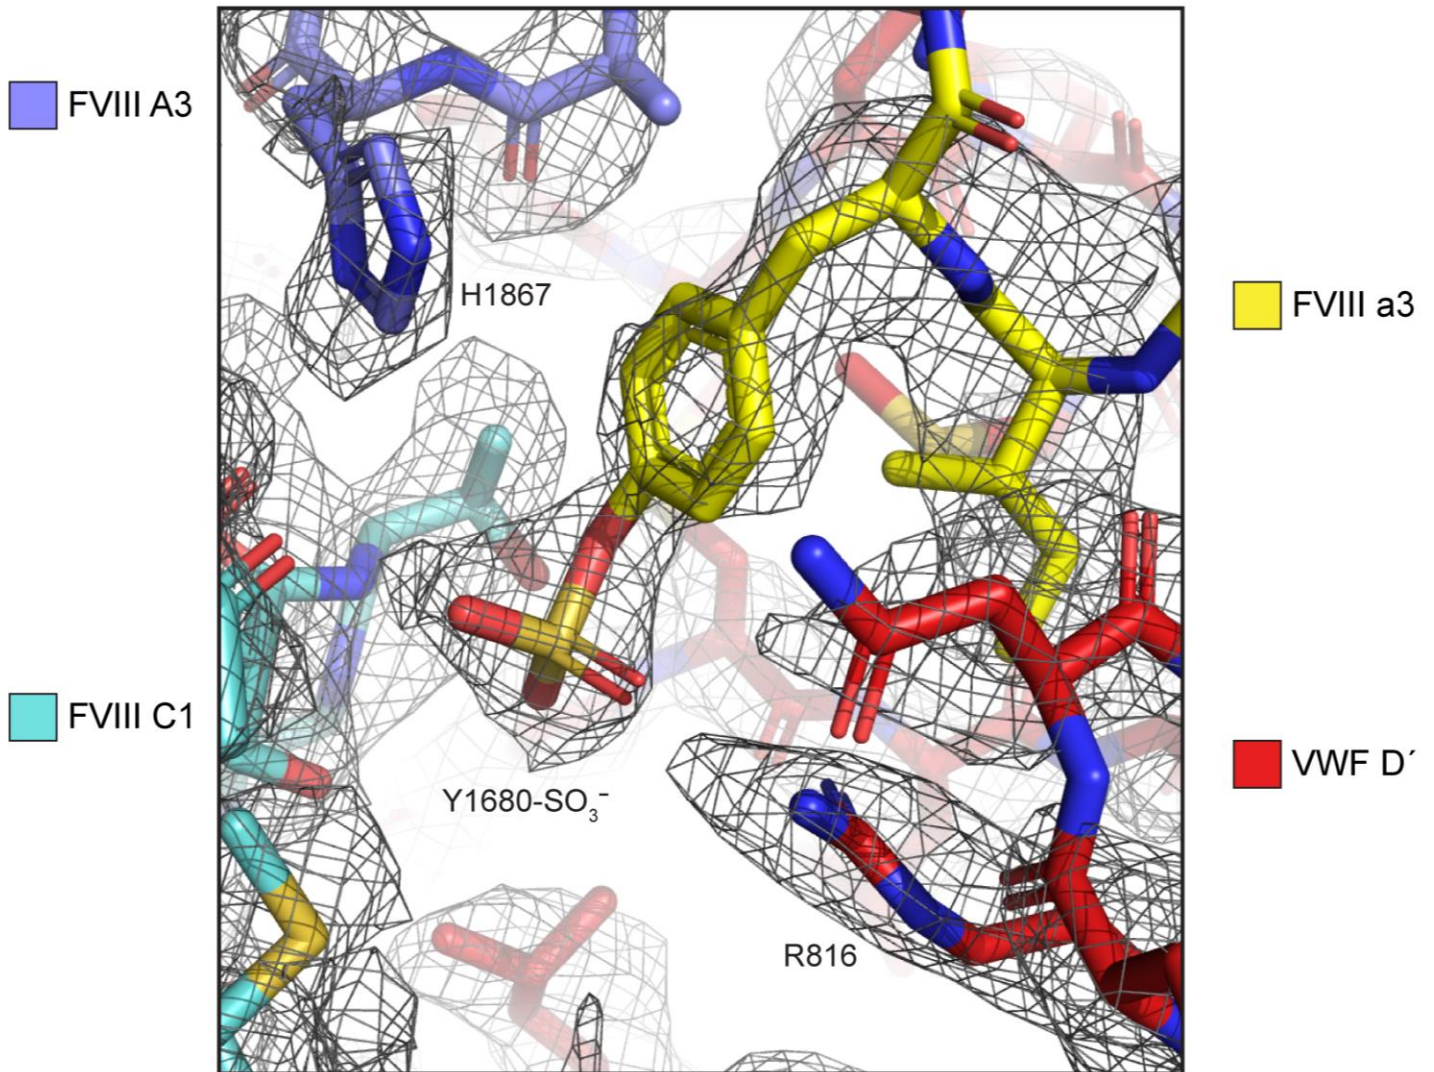

# Supplemental Figure 7

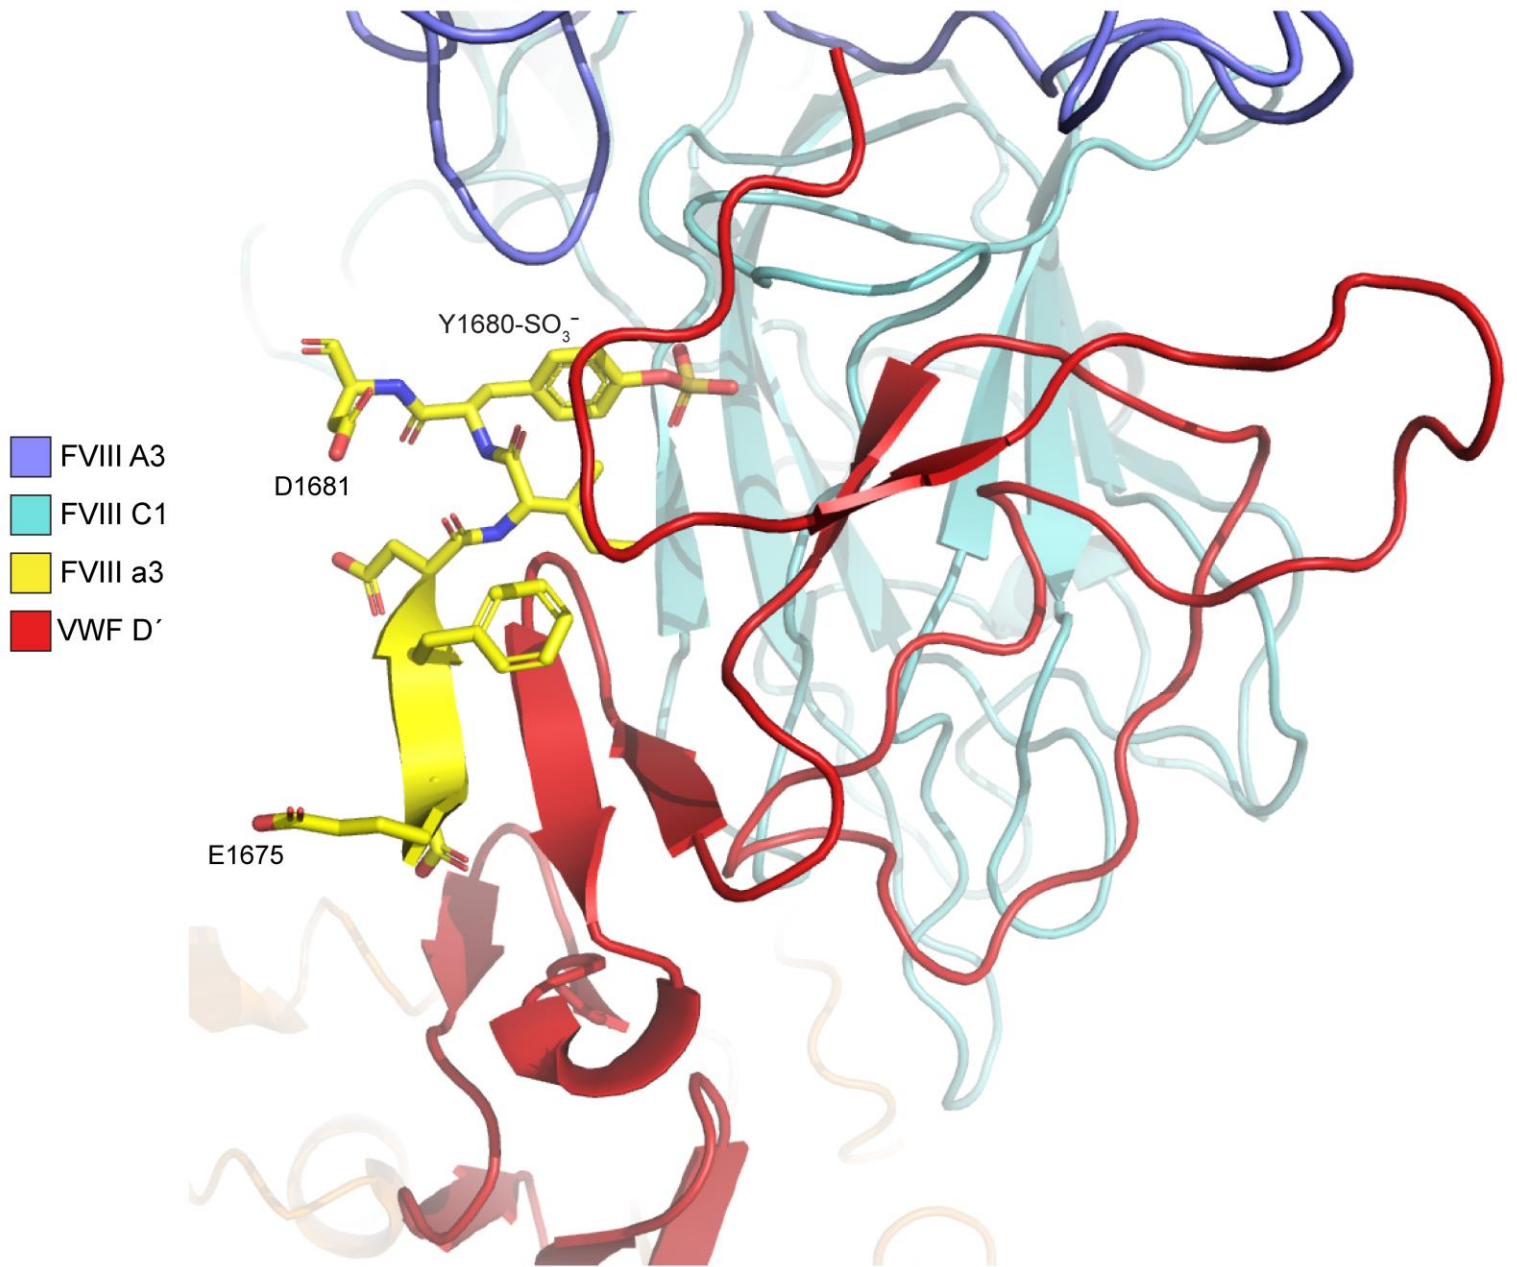

# Supplemental Movie 1

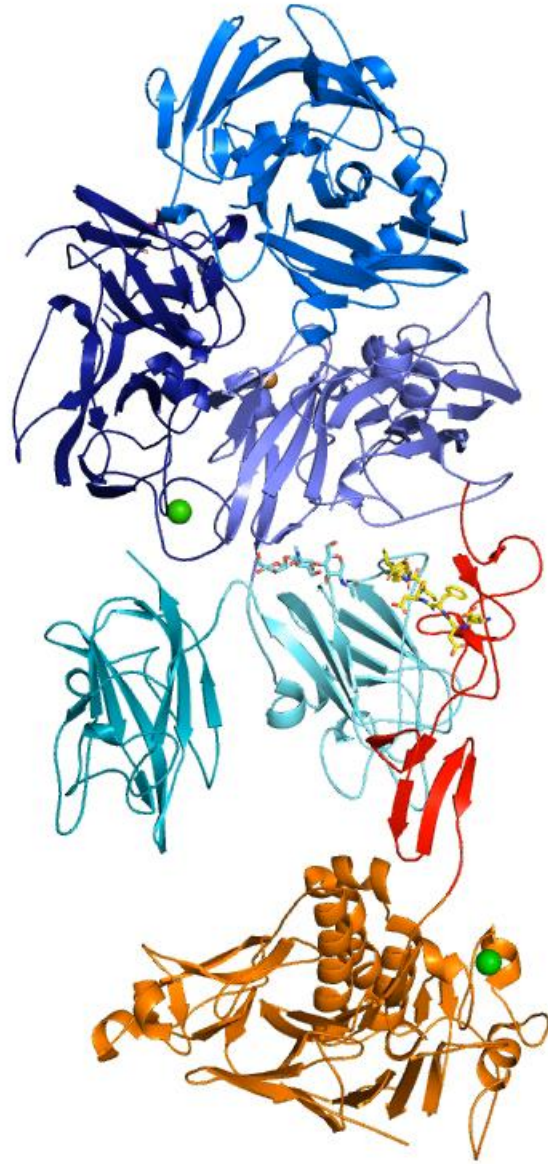

Supplement: bloodBLD2020009197-suppl2.pdf [file bloodBLD2020009197-suppl2.pdf]
